# Supplementary material for: Meat Starter Culture Reduces Aspergillus parasiticus Production of Aflatoxins on Meat-Based and Salami Model Media
Source: MDPI journal article supplement (doi:10.3390/toxins16040173), 2024-04-02
Supplement: s1 [file s1]

# Supplementary Materials: Meat Starter Culture Reduces *Aspergillus parasiticus* Production of Aflatoxins on Meat-Based and Salami Model Media

Iva Zahija Jazbec, Lea Demšar, Barbka Jeršek and Tomaž Polak

**Table S1.** Aflatoxin B1 production (mean  $\pm$  SD  $\mu\text{g/kg}$ ) and colony diameter (mean  $\pm$  SD mm) by *A. parasiticus* grown on cooked meat agar media at 25 °C and at temperatures in the ripening chamber for 21 days.

| Medium and incubation conditions | AFB1 ( $\mu\text{g/kg}$ )          |                                         |                                         |                                         |              | COLONY DIAMETER (mm)               |                                    |                                    |                                    |              |
|----------------------------------|------------------------------------|-----------------------------------------|-----------------------------------------|-----------------------------------------|--------------|------------------------------------|------------------------------------|------------------------------------|------------------------------------|--------------|
|                                  | 2 days                             | 7 days                                  | 14 days                                 | 21 days                                 | KW (P)       | 2 days                             | 7 days                             | 14 days                            | 21 days                            | KW (P)       |
| CMA IN                           | 1.86 <sup>d</sup><br>$\pm 0.17$    | 9.18 <sup>c</sup><br>$\pm 0.44$         | 116.94 <sup>b</sup><br>$\pm 2.79$       | 397.89 <sup>a,*</sup><br>$\pm 5.68$     | $\leq 0.001$ | 20.50 <sup>c,*</sup><br>$\pm 0.34$ | 70.00 <sup>b,*</sup><br>$\pm 0.26$ | 85.00 <sup>a,*</sup><br>$\pm 0.00$ | 85.00 <sup>a,*</sup><br>$\pm 0.00$ | $\leq 0.001$ |
| CMA-SC IN                        | 1.03 <sup>c</sup><br>$\pm 0.15$    | 2.54 <sup>a</sup><br>$\pm 0.29$         | 1.67 <sup>b</sup><br>$\pm 0.38$         | 1.86 <sup>b,*</sup><br>$\pm 0.43$       | 0.034        | 14.17 <sup>d,*</sup><br>$\pm 0.17$ | 42.83 <sup>c,*</sup><br>$\pm 0.31$ | 50.33 <sup>b,*</sup><br>$\pm 0.21$ | 62.67 <sup>a,*</sup><br>$\pm 0.84$ | $\leq 0.001$ |
| CMA-GYE IN                       | 7.29 <sup>d,*</sup><br>$\pm 0.38$  | 4652.73 <sup>c,*</sup><br>$\pm 73.11$   | 12356.73 <sup>b,*</sup><br>$\pm 104.63$ | 16330.81 <sup>a,*</sup><br>$\pm 146.72$ | $\leq 0.001$ | 23.50 <sup>d,*</sup><br>$\pm 0.22$ | 60.50 <sup>c,*</sup><br>$\pm 0.22$ | 75.00 <sup>b,*</sup><br>$\pm 0.20$ | 77.50 <sup>a,*</sup><br>$\pm 0.22$ | $\leq 0.001$ |
| CMA-GYESC IN                     | 17.16 <sup>d,*</sup><br>$\pm 2.60$ | 2667.08 <sup>c,*</sup><br>$\pm 132.34$  | 9696.74 <sup>b,*</sup><br>$\pm 158.44$  | 12939.97 <sup>a,*</sup><br>$\pm 120.91$ | $\leq 0.001$ | 19.83 <sup>c,*</sup><br>$\pm 0.17$ | 56.50 <sup>b,*</sup><br>$\pm 0.56$ | 85.00 <sup>a,*</sup><br>$\pm 0.00$ | 85.00 <sup>a,*</sup><br>$\pm 0.00$ | $\leq 0.001$ |
| CMA RC                           | 1.09 <sup>d</sup><br>$\pm 0.20$    | 3.46 <sup>c</sup><br>$\pm 0.18$         | 4.56 <sup>b</sup><br>$\pm 0.13$         | 6.21 <sup>a</sup><br>$\pm 0.08$         | $\leq 0.001$ | 15.83 <sup>d,*</sup><br>$\pm 0.31$ | 46.83 <sup>c,*</sup><br>$\pm 0.31$ | 60.50 <sup>b,*</sup><br>$\pm 0.56$ | 72.17 <sup>a</sup><br>$\pm 0.40$   | $\leq 0.001$ |
| CMA-SC RC                        | 1.62 <sup>a</sup><br>$\pm 0.27$    | 2.43 <sup>a</sup><br>$\pm 0.35$         | 1.93 <sup>a</sup><br>$\pm 0.40$         | 2.16 <sup>a</sup><br>$\pm 0.42$         | 0.365        | 10.50 <sup>c,*</sup><br>$\pm 0.34$ | 10.83 <sup>c,*</sup><br>$\pm 0.31$ | 22.17 <sup>b,*</sup><br>$\pm 0.31$ | 25.50 <sup>a</sup><br>$\pm 0.50$   | $\leq 0.001$ |
| CMA-GYE RC                       | 7.86 <sup>c,*</sup><br>$\pm 0.77$  | 10789.54 <sup>b,*</sup><br>$\pm 124.84$ | 14536.24 <sup>a,*</sup><br>$\pm 193.29$ | 14886.08 <sup>a,*</sup><br>$\pm 130.27$ | $\leq 0.001$ | 20.50 <sup>d,*</sup><br>$\pm 0.34$ | 44.50 <sup>c,*</sup><br>$\pm 0.43$ | 61.17 <sup>b,*</sup><br>$\pm 0.40$ | 65.00 <sup>a</sup><br>$\pm 0.37$   | $\leq 0.001$ |
| CMA-GYESC RC                     | 34.52 <sup>d,*</sup><br>$\pm 5.23$ | 8496.85 <sup>c,*</sup><br>$\pm 756.01$  | 13873.48 <sup>a,*</sup><br>$\pm 284.95$ | 12065.03 <sup>b,*</sup><br>$\pm 239.55$ | $\leq 0.001$ | 18.00 <sup>d,*</sup><br>$\pm 0.26$ | 46.00 <sup>c,*</sup><br>$\pm 0.37$ | 68.83 <sup>b,*</sup><br>$\pm 0.40$ | 76.17 <sup>a</sup><br>$\pm 0.40$   | $\leq 0.001$ |

KW – Kruskal-Wallis test; P - statistical significance. For abbreviations, see the paragraph 4.2 Culture media preparation. IN: incubation at constant temperature of 25 °C; RC: temperatures typical for salami ripening presented in Fig. S1. a-d: data with different superscript letters within row differ significantly ( $p \leq 0.05$ ). \* represents statistically significant difference between same type of media and the same incubation treatment incubated with and without SC ( $p \leq 0.05$ ).

**Table S2.** Aflatoxin B1 production (mean  $\pm$  SD  $\mu\text{g/kg}$ ) and colony diameter (mean  $\pm$  SD mm) by *A. parasiticus* grown on salami model media at 25 °C and at ripening chamber temperatures during 21 days.

| Medium and incubation conditions | AFB1 ( $\mu\text{g/kg}$ )          |                                        |                                        |                                        |              | COLONY DIAMETER (mm)              |                                    |                                    |                                    |              |
|----------------------------------|------------------------------------|----------------------------------------|----------------------------------------|----------------------------------------|--------------|-----------------------------------|------------------------------------|------------------------------------|------------------------------------|--------------|
|                                  | 2 days                             | 7 days                                 | 14 days                                | 21 days                                | KW (P)       | 2 days                            | 7 days                             | 14 days                            | 21 days                            | KW (P)       |
| SM-G IN                          | 40.21 <sup>d,*</sup><br>$\pm 6.11$ | 2726.36 <sup>c,*</sup><br>$\pm 46.23$  | 4148.87 <sup>b,*</sup><br>$\pm 25.44$  | 7357.69 <sup>a,*</sup><br>$\pm 58.02$  | $\leq 0.001$ | 5.33 <sup>d,*</sup><br>$\pm 0.21$ | 19.67 <sup>c</sup><br>$\pm 0.33$   | 24.67 <sup>b,*</sup><br>$\pm 0.49$ | 33.50 <sup>a,*</sup><br>$\pm 0.56$ | $\leq 0.001$ |
| SM-GSC IN                        | 17.33 <sup>c,*</sup><br>$\pm 0.71$ | 1383.89 <sup>b,*</sup><br>$\pm 56.95$  | 1397.64 <sup>b,*</sup><br>$\pm 77.58$  | 1748.36 <sup>a,*</sup><br>$\pm 36.71$  | $\leq 0.001$ | 9.50 <sup>d,*</sup><br>$\pm 0.34$ | 19.67 <sup>c,*</sup><br>$\pm 0.49$ | 35.83 <sup>b,*</sup><br>$\pm 0.31$ | 43.67 <sup>a,*</sup><br>$\pm 0.49$ | $\leq 0.001$ |
| SM-GYE IN                        | 12.15 <sup>d</sup><br>$\pm 0.88$   | 2226.37 <sup>c,*</sup><br>$\pm 107.82$ | 4405.24 <sup>b</sup><br>$\pm 115.53$   | 6169.45 <sup>a,*</sup><br>$\pm 112.82$ | $\leq 0.001$ | 5.83 <sup>d,*</sup><br>$\pm 0.31$ | 21.50 <sup>c,*</sup><br>$\pm 0.43$ | 34.00 <sup>b,*</sup><br>$\pm 0.37$ | 40.67 <sup>a,*</sup><br>$\pm 0.33$ | $\leq 0.001$ |
| SM-GYESC IN                      | 13.58 <sup>d</sup><br>$\pm 1.26$   | 1907.98 <sup>c,*</sup><br>$\pm 186.03$ | 4437.13 <sup>b</sup><br>$\pm 135.56$   | 5810.05 <sup>a,*</sup><br>$\pm 50.95$  | $\leq 0.001$ | 9.83 <sup>d,*</sup><br>$\pm 0.31$ | 28.50 <sup>c,*</sup><br>$\pm 0.34$ | 43.67 <sup>b,*</sup><br>$\pm 0.49$ | 52.00 <sup>a,*</sup><br>$\pm 0.26$ | $\leq 0.001$ |
| SM-G RC                          | 9.18 <sup>c</sup><br>$\pm 0.29$    | 1901.59 <sup>b,*</sup><br>$\pm 59.60$  | 3394.03 <sup>b,*</sup><br>$\pm 73.95$  | 3766.93 <sup>a,*</sup><br>$\pm 88.42$  | $\leq 0.001$ | 5.33 <sup>d,*</sup><br>$\pm 0.21$ | 12.00 <sup>c,*</sup><br>$\pm 0.26$ | 17.33 <sup>b,*</sup><br>$\pm 0.80$ | 19.17 <sup>a,*</sup><br>$\pm 0.40$ | $\leq 0.001$ |
| SM-GSC RC                        | 8.31 <sup>c</sup><br>$\pm 0.28$    | 1089.05 <sup>b,*</sup><br>$\pm 19.47$  | 1439.15 <sup>a,*</sup><br>$\pm 56.76$  | 1362.30 <sup>a,*</sup><br>$\pm 27.49$  | $\leq 0.001$ | 7.83 <sup>d,*</sup><br>$\pm 0.31$ | 17.17 <sup>c,*</sup><br>$\pm 0.79$ | 21.83 <sup>b,*</sup><br>$\pm 0.17$ | 23.50 <sup>a,*</sup><br>$\pm 0.34$ | $\leq 0.001$ |
| SM-GYE RC                        | 8.37 <sup>d</sup><br>$\pm 0.32$    | 1427.43 <sup>b,*</sup><br>$\pm 25.95$  | 1361.61 <sup>c,*</sup><br>$\pm 41.38$  | 1826.73 <sup>a,*</sup><br>$\pm 73.88$  | $\leq 0.001$ | 5.33 <sup>d,*</sup><br>$\pm 0.21$ | 14.83 <sup>c,*</sup><br>$\pm 0.31$ | 20.83 <sup>b,*</sup><br>$\pm 0.31$ | 23.50 <sup>a,*</sup><br>$\pm 0.34$ | $\leq 0.001$ |
| SM-GYESC RC                      | 10.51 <sup>d</sup><br>$\pm 0.73$   | 1063.36 <sup>c,*</sup><br>$\pm 22.26$  | 1941.55 <sup>a,*</sup><br>$\pm 100.78$ | 1450.81 <sup>b,*</sup><br>$\pm 51.93$  | $\leq 0.001$ | 8.50 <sup>d,*</sup><br>$\pm 0.22$ | 13.00 <sup>c,*</sup><br>$\pm 0.26$ | 20.83 <sup>b</sup><br>$\pm 0.31$   | 23.17 <sup>a</sup><br>$\pm 0.40$   | $\leq 0.001$ |

KW – Kruskal-Wallis test; P - statistical significance. For abbreviations, see the paragraph 4.2 Culture media preparation. IN: incubation at constant temperature of 25 °C; RC: temperatures typical for salami ripening presented in Fig. S1. a-d: data with different superscript letters within row differ significantly ( $p \leq 0.05$ ). \* represents statistically significant difference between same type of media and the same incubation treatment incubated with and without SC ( $p \leq 0.05$ ).

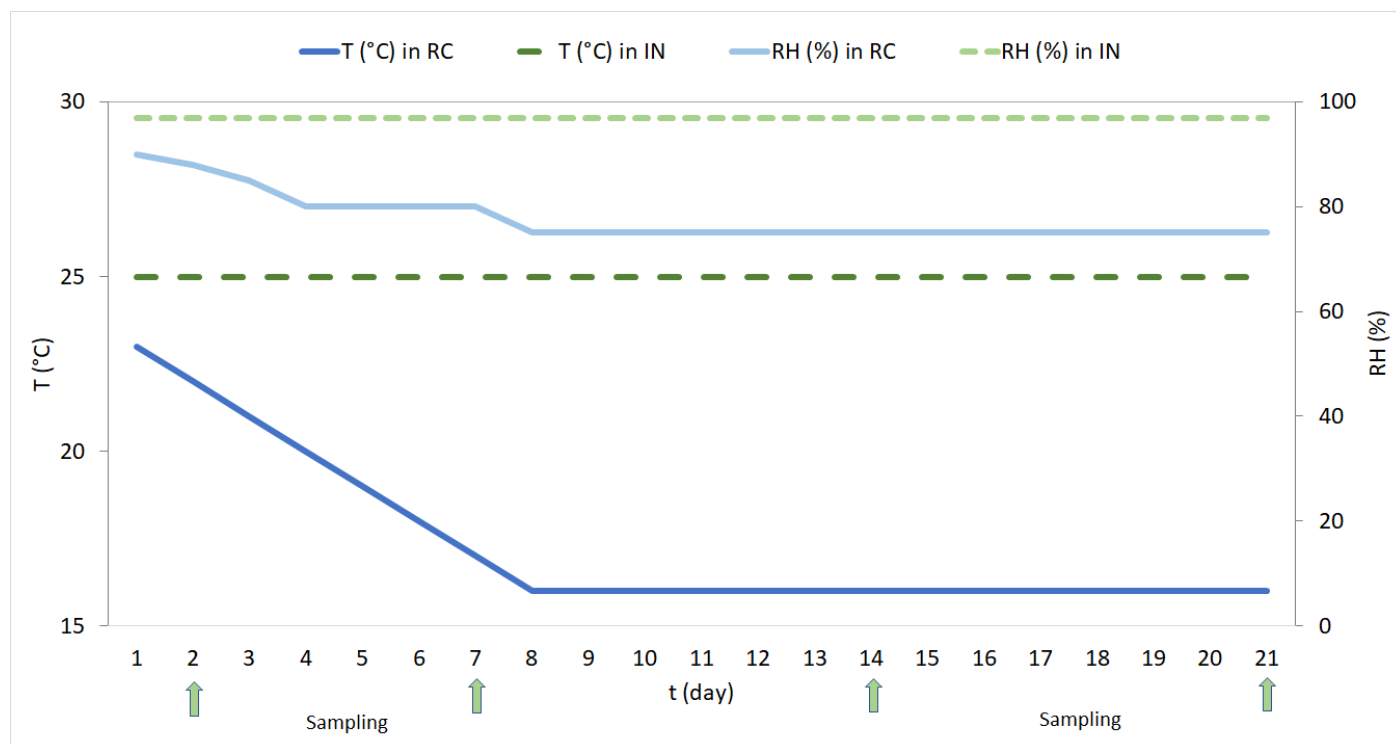

**Figure S1.** Temperature and relative humidity during the 21-day incubation of media in the ripening chamber (RC) and in the incubator (IN).
